# Supplementary material
Source: PubMed Central journal article supplement (PMC3289968)
Supplement: NIHMS323480-supplement-supplement_1.pdf [file NIHMS323480-supplement-supplement_1.pdf]

**(Online) Table 6.** Top contributors<sup>a</sup> to total carbohydrate and dietary fiber in Puerto Rican adults by poverty status

|                                                      | <b>Below</b>   |             | <b>Above</b>   |             | <b>GI<sup>b</sup></b> | <b>GI Class<sup>c</sup></b> |
|------------------------------------------------------|----------------|-------------|----------------|-------------|-----------------------|-----------------------------|
|                                                      | <b>Poverty</b> |             | <b>Poverty</b> |             |                       |                             |
|                                                      | <b>%</b>       | <b>Rank</b> | <b>%</b>       | <b>Rank</b> |                       |                             |
| Total carbohydrate, mean $\pm$ SE (g/d) <sup>d</sup> | 269 $\pm$ 1.9  |             | 267 $\pm$ 2.1  |             |                       |                             |
| White rice                                           | 6.4            | 1           | 6.1            | 1           | 79                    | High                        |
| Rice with beans or pigeon peas                       | 5.7            | 2           | 5.6            | 2           | 66                    | Medium                      |
| Beans and peas                                       | 5.6            | 3           | 5.3            | 3           | 31                    | Low                         |
| Milk (including in cereal or coffee/tea)             | 3.8            | 4           | 3.6            | 4           | 31                    | Low                         |
| Sugar in coffee and/or tea                           | 3.6            | 5           | 3.4            | 6           | 65                    | Medium                      |
| White bread                                          | 3.5            | 6           | 3.0            | 8           | 71                    | High                        |
| Orange juice (100% juice)                            | 3.2            | 7           | 3.4            | 5           | 50                    | Low                         |
| Cold cereal                                          | 3.2            | 8           | 3.1            | 7           | 72                    | High                        |
| Soft drinks, regular                                 | 3.0            | 9           | 2.6            | 9           | 57                    | Medium                      |
| Plantains, green bananas                             | 2.5            | 10          | 2.4            | 10          | 54                    | Low                         |
| Hispanic root crops                                  | 2.2            | 11          | 2.1            | 11          | 69                    | Medium                      |
| Dietary fiber, mean $\pm$ SE (g/d) <sup>d</sup>      | 19.0 $\pm$ 0.2 |             | 19.4 $\pm$ 0.3 |             |                       |                             |
| Beans and peas                                       | 25.4           | 1           | 23.5           | 1           | 31                    | Low                         |
| Rice with beans or pigeon peas                       | 7.3            | 2           | 7.1            | 2           | 66                    | Medium                      |
| Oatmeal                                              | 4.0            | 3           | 3.4            | 3           | 66                    | Medium                      |

|                          |     |    |     |    |    |        |
|--------------------------|-----|----|-----|----|----|--------|
| Hispanic root crops      | 3.3 | 4  | 3.1 | 4  | 69 | Medium |
| Cold cereal              | 3.0 | 5  | 2.9 | 5  | 72 | High   |
| Plantains, green bananas | 2.7 | 6  | 2.5 | 6  | 54 | Low    |
| French fries             | 2.6 | 7  | 2.5 | 7  | 69 | Medium |
| White bread              | 2.1 | 8  | 1.9 | 10 | 71 | High   |
| 100% whole wheat bread   | 1.3 | 15 | 2.1 | 8  | 69 | Medium |
| Salad greens             | 1.9 | 9  | 2.0 | 9  | 0  | -      |

<sup>a</sup>Foods were included if they contributed at least 2% to total daily nutrient intake in either poverty status group.

<sup>b</sup>GI values listed are based on glucose as the reference.

<sup>c</sup>GI classifications are: low GI:  $\leq 55$ ; medium GI: 56-69; and high GI:  $\geq 70$  (53).

<sup>d</sup>Total carbohydrate and dietary fiber (mean  $\pm$  SE, g/d) were adjusted for age, sex, total energy, and type 2 diabetes.
